# Supplementary material for: Assessment of Machine Learning of Breast Pathology Structures for Automated Differentiation of Breast Cancer and High-Risk Proliferative Lesions
Source: PubMed Central journal article supplement (PMC6692690; doi:10.1001/jamanetworkopen.2019.8777), 2019-08-09
Supplement: jamanetwopen-2-e198777-s001.pdf [file jamanetwopen-2-e198777-s001.pdf]

## Supplementary Online Content

Mercan E, Mehta S, Bartlett J, Shapiro LG, Weaver DL, Elmore JG. Assessment of machine learning of breast pathology structures for automated differentiation of breast cancer and high-risk proliferative lesions. *JAMA Netw Open*. 2019;2(8):e198777. doi:10.1001/jamanetworkopen.2019.8777

**eTable 1.** Hierarchical Description Showing the Mapping Used to Characterize Individual Interpretations Into 1 of the 4 Major Categories Used in this Analysis

**eTable 2.** Patient and Case Characteristics of 240 Whole Slide Images

This supplementary material has been provided by the authors to give readers additional information about their work.

**eTable 1.** Hierarchical Description Showing the Mapping Used to Characterize Individual Interpretations Into 1 of the 4 Major Categories Used in this Analysis

| Diagnosis                                        | Mapping  |
|--------------------------------------------------|----------|
| Non-proliferative Changes Only                   | Benign   |
| Fibroadenoma (FA) <sup>b</sup>                   | Benign   |
| Intraductal Papilloma Without Atypia             | Benign   |
| Usual Ductal Hyperplasia (UDH)                   | Benign   |
| Columnar Cell Hyperplasia / Columnar Cell Change | Benign   |
| Sclerosing Adenosis                              | Benign   |
| Radial Scar/ Complex Sclerosing Lesion           | Benign   |
| Flat Epithelial Atypia (FEA) <sup>c</sup>        | Atypia   |
| Atypical Ductal Hyperplasia (ADH)                | Atypia   |
| Intraductal Papilloma With Atypia                | Atypia   |
| Atypical Lobular Hyperplasia (ALH) <sup>d</sup>  | Atypia   |
| Ductal Carcinoma in-situ (DCIS)                  | DCIS     |
| Lobular Carcinoma in-situ (LCIS)                 | DCIS     |
| Invasive (ductal or lobular) cancer              | Invasive |

<sup>a</sup>Only data from the Phase II digital arm is included in this analysis. Please refer to: Elmore JG, Longton GM, Pepe MS, et al. A Randomized Study Comparing Digital Imaging to Traditional Glass Slide Microscopy for Breast Biopsy and Cancer Diagnosis. *J Pathol Inform.* 2017;8:12. Published 2017 Mar 10. doi:10.4103/2153-3539.201920. In this previous paper, data were reported on N=86 pathologists who were randomized to the digital format in Phase II. The current paper includes data from one additional pathologist who requested to interpret cases in digital format in Phase II, thus N=87).

<sup>b</sup>FA is grouped with Benign. FA is technically a proliferative lesion but has little associated risk.

<sup>c</sup>FEA was grouped with ADH in the atypia category because FEA may lead to excision in some institutions.

<sup>d</sup>ALH is grouped with ADH in the atypia category and LCIS is grouped with DCIS following traditional cancer progression schemes.

**eTable 2.** Patient and Case Characteristics of 240 Whole Slide Images

| Patient and case characteristics |                                    | # Cases (%)        |
|----------------------------------|------------------------------------|--------------------|
| <b>Patient characteristics</b>   |                                    |                    |
| Age                              |                                    |                    |
|                                  | 40–49 years                        | 118 (49.2)         |
|                                  | 50–59                              | 122 (50.8)         |
| Breast density                   |                                    |                    |
|                                  | Almost entirely fat                | 13 (5.4)           |
|                                  | Scattered fibroglandular densities | 105 (43.8)         |
|                                  | Heterogeneously dense              | 97 (40.4)          |
|                                  | Extremely dense                    | 25 (10.4)          |
| <b>Case characteristics</b>      |                                    |                    |
| Biopsy type                      |                                    |                    |
|                                  | Core needle biopsy                 | 138 (57.5)         |
|                                  | Excisional biopsy                  | 102 (42.5)         |
| Expert consensus diagnosis*      |                                    |                    |
|                                  | Benign                             | 72 (30.0)          |
|                                  | Atypia                             | 72 (30.0)          |
|                                  | DCIS                               | 73 (30.4)          |
|                                  | Invasive cancer                    | 23 (9.6)           |
| <b>Total</b>                     |                                    | <b>240 (100.0)</b> |

- The expert consensus diagnosis was obtained using original glass slides, after independent interpretation by three experienced breast pathologists followed by in person meetings using a modified Delfi method to define the expert consensus diagnosis on each case.
